# Supplementary material for: Comparison of Relative and Absolute Heatwaves in Eastern China: Observations, Simulations and Future Projections
Source: MDPI journal article supplement (doi:10.3390/atmos13050649), 2022-04-20
Supplement: s1 [file s1]

# Supplementary Materials: Comparison of Relative and Absolute Heatwaves in Eastern China: Observations, Simulations and Future Projections

Haoran Xu <sup>1</sup> and Guwei Zhang <sup>2,\*</sup>

**Table S1.** Twenty-seven CMIP6 models basic information.

| Model            | Institution/Country (Region) | Resolution |
|------------------|------------------------------|------------|
| ACCESS-CM2       | CSIRO/Australia              | 144 × 192  |
| ACCESS-ESM1-5    | CSIRO/Australia              | 145 × 192  |
| AWI-CM-1-1-MR    | AWI /German                  | 192 × 384  |
| BCC-CSM2-MR      | BCC/China                    | 160 × 320  |
| CanESM5          | CCCma/Canada                 | 64 × 128   |
| CESM             | NCAR/USA                     | 192 × 288  |
| CMCC-ESM2        | MCCC/Europe                  | 192 × 288  |
| CNRM-CM6-1       | CNRM-CERFACS/France          | 128 × 256  |
| CNRM-ESM2-1      | CNRM-CERFACS/France          | 128 × 256  |
| EC-Earth3        | EC-Earth-Consortium/Europe   | 256 × 512  |
| EC-Earth3-Veg    | EC-Earth-Consortium/Europe   | 256 × 512  |
| EC-Earth3-Veg-LR | EC-Earth-Consortium/Europe   | 160 × 320  |
| FGOALS-g3        | CAS/China                    | 80 × 180   |
| HadGEM3-GC3-LL   | MOHC/UK                      | 144 × 192  |
| INM-CM4-8        | INM/Russia                   | 120 × 180  |
| INM-CM5-0        | INM/Russia                   | 120 × 180  |
| IPSL-CM6A-LR     | IPSL/France                  | 143 × 144  |
| MIROC6           | MIROC/Japan                  | 128 × 256  |
| MIROC-ES2L       | MIROC/Japan                  | 64 × 128   |
| MPI-ESM-1-2-HR   | MPI-M/Germany                | 192 × 384  |
| MPI-ESM-1-2-LR   | MPI-M/Germany                | 96 × 192   |
| MRI-ESM2-0       | MRI/Japan                    | 160 × 320  |
| NESM             | NUIST/China                  | 96 × 192   |
| NorESM2-LM       | NCC/Norway                   | 96 × 144   |
| NorESM2-MM       | NCC/Norway                   | 192 × 288  |
| UKESM1-0-LL      | MOHC/UK                      | 144 × 192  |

The resolution is given in terms of total latitude × longitude grid points over the globe.

**Table S2.** Details of subregions in Eastern China.

| Abbreviation | Full name            | Latitude and longitude range |
|--------------|----------------------|------------------------------|
| NEC          | Northeast China      | 38°-54°N,121°-135°E          |
| NC           | North China          | 35°-45°N,110°-120°E          |
| LYR          | Lower Yangtze River  | 27°-34.5°N,115°-123°E        |
| MYR          | Middle Yangtze River | 27°-34.5°N,103°-115°E        |
| SC           | South China          | 18°-26.5°N,108°-123°E        |

**Table S3.** Temporal correlations between RHW and AHW during present-day period.

|     | Heatwave Features | NEC  | NC   | LYR  | SC   | MYR  |
|-----|-------------------|------|------|------|------|------|
| OBS | R-HWAI & A-HWAI   | 0.72 | 0.87 | 0.91 | 0.86 | 0.88 |
|     | R-HWAD & A-HWAD   | 0.64 | 0.78 | 0.70 | 0.59 | 0.84 |
| MME | R-HWAI & A-HWAI   | 0.72 | 0.82 | 0.94 | 0.86 | 0.91 |
|     | R-HWAD & A-HWAD   | 0.64 | 0.82 | 0.92 | 0.81 | 0.80 |

All values indicate statistical significance at the 0.05 level.

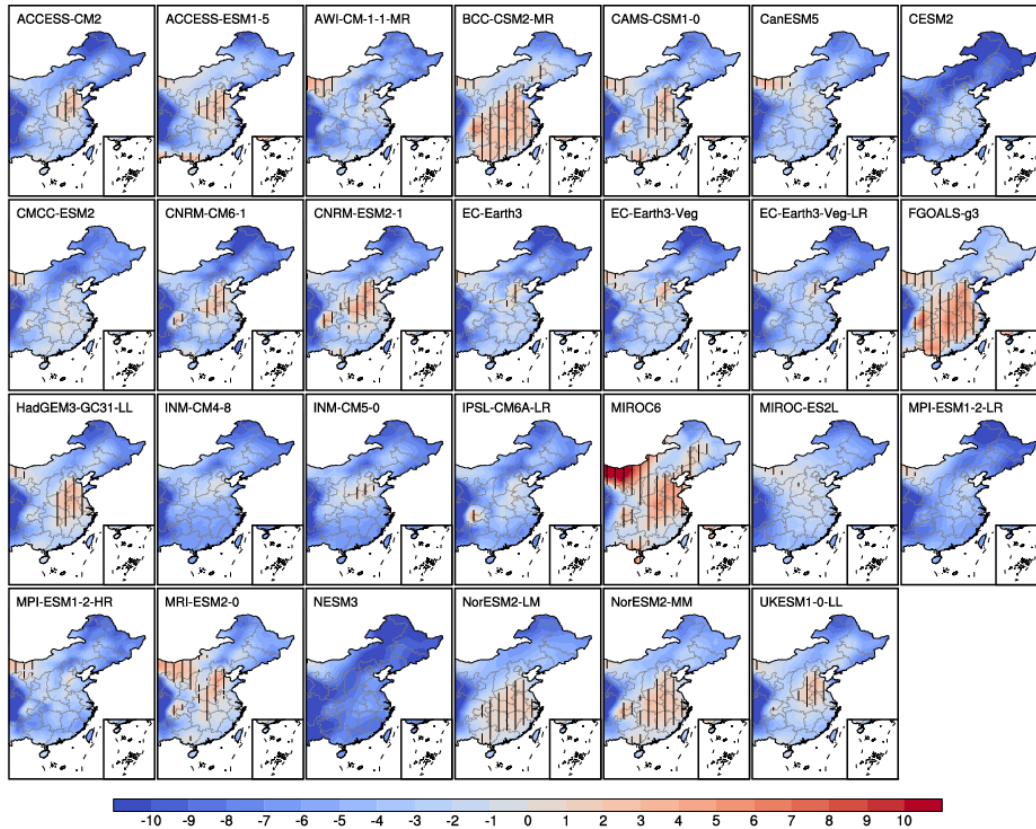

**Figure S1.** Differences between the relative threshold and the absolute threshold (35°C) for each CMIP6 model. The vertical-line areas indicate values greater than zero.

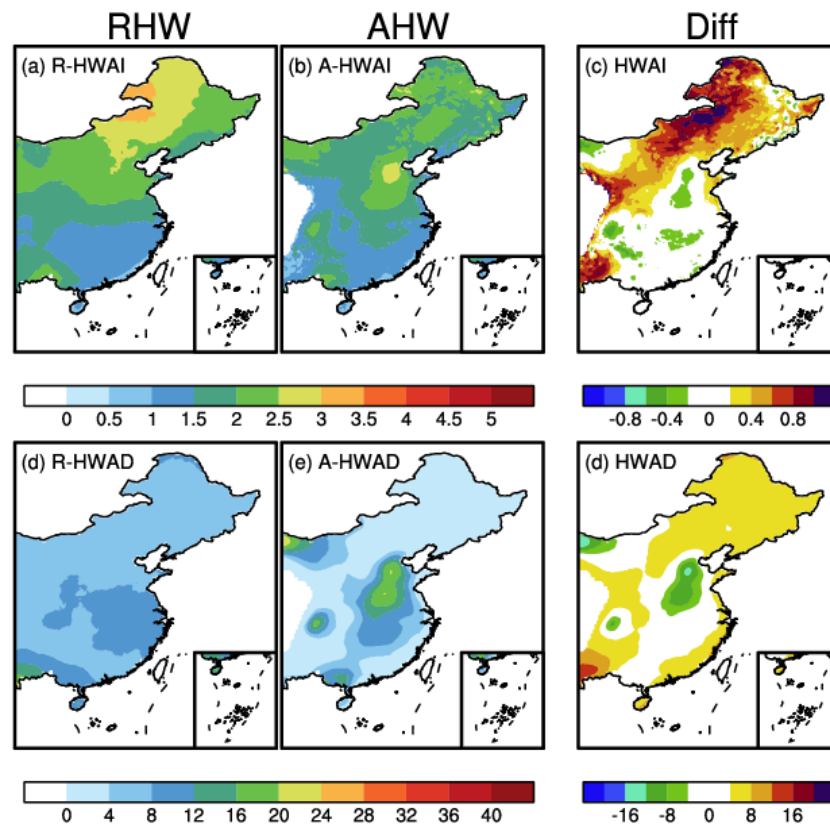

**Figure S2.** MME simulated heatwave indicators averaged for present-day (1995-2014). RHW (a & b) and AHW (d & e) represent the results calculated by the relative and the absolute thresholds. Diff

(c & f) is the result of RHW minus AHW. The units of HWAI and HWAD are °C and days, respectively.

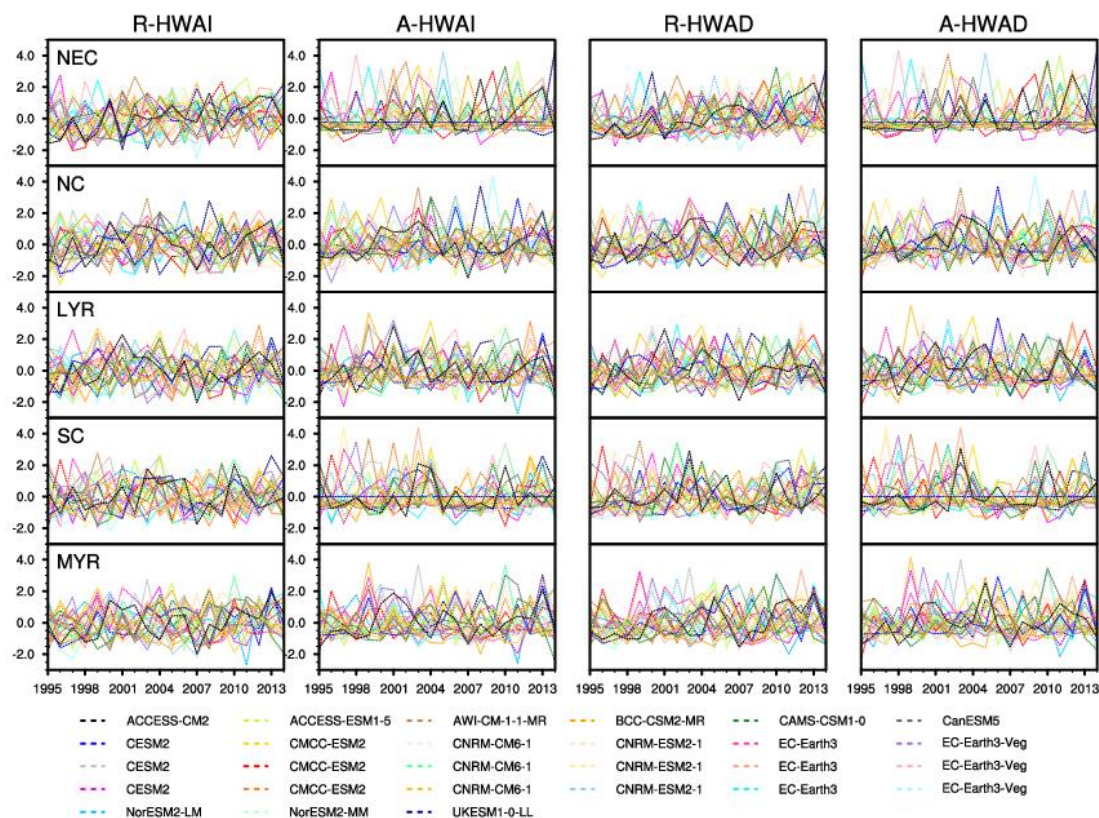

**Figure S3.** Standardized time series of R-HWAI, A-HWAI, R-HWAD, and A-HWAD from 1995 to 2014 for five sub-regions in EC. Colored dashed lines are the result of each model.

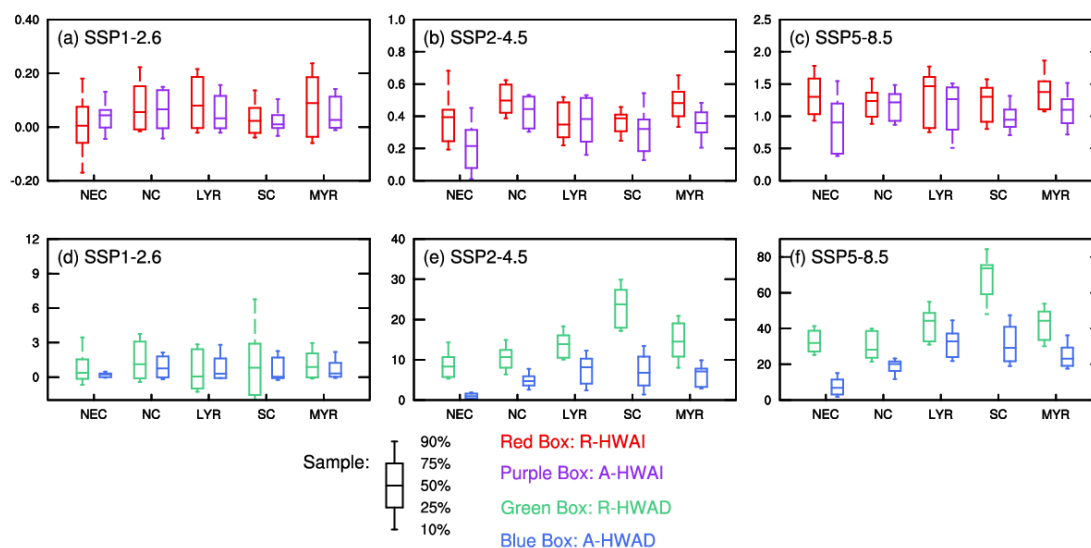

**Figure S4.** Regional mean changes in HWAI (°C) and HWAD (days) relative to 2041-2060 for 2081-2100 under SSP1-2.6 (a & d), SSP2-4.5 (b & e), and SSP5-8.5 (c & f). The red, purple, green, and blue box indicates R-HWAI, A-HWAI, R-HWAI, and A-HWAI, respectively. The box whisker plots are the 10th, 25th, 50th, 75th, and 90th intervals.

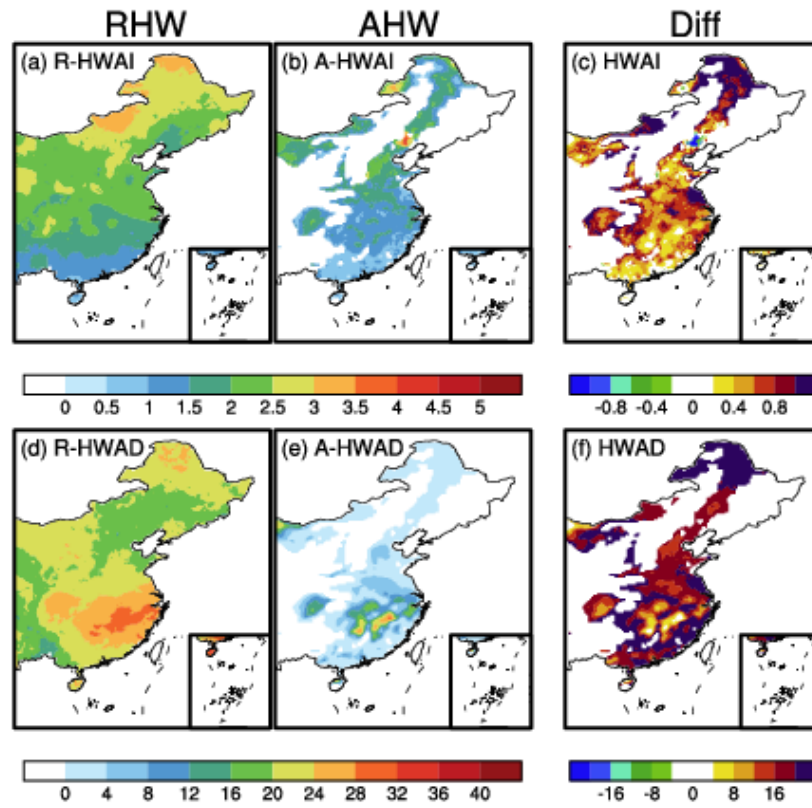

**Figure S5.** Same as Figure.3, but the minimum consecutive days for AHW was changed to 4 days.

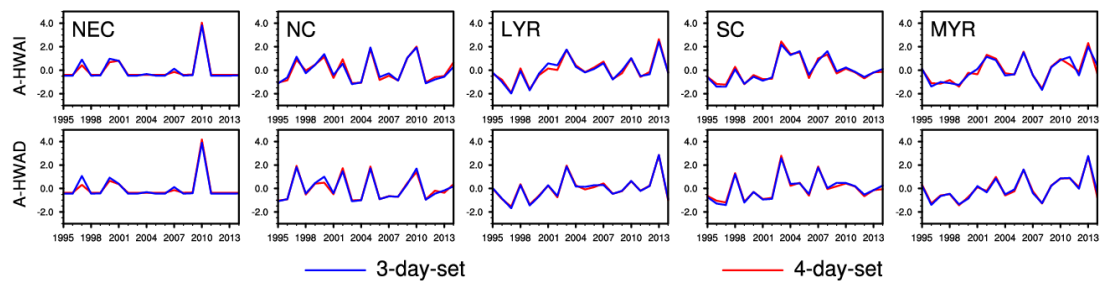

**Figure S6.** Standardized time series of AHW indicators from 1995 to 2014 for five sub-regions in EC. Blue and red solid lines indicate the 3-day-set (original) and 4-day-set AHW.
