# Supplementary material for: Comparison of Relative and Absolute Heatwaves in Eastern China: Observations, Simulations and Future Projections
Source: MDPI journal article supplement (doi:10.3390/atmos13050649), 2022-04-20
Supplement: s1 [file s1]

Archive with 1 entries (1 files):
- atmosphere-1642518-supplementary.pdf
